# Supplementary material for: Computational discovery of cis-regulatory modules in Drosophila without prior knowledge of motifs
Source: Springer Nature journal article supplement (doi:10.1186/gb-2008-9-1-r22), 2008-01-28
Supplement: Additional file 1 [file gb-2008-9-1-r22-s1.pdf]

Supplementary Materials:  
Computational discovery of cis-regulatory modules in *Drosophila*,  
without prior knowledge of motifs

Andra Ivan , Marc Halfon and Saurabh Sinha

Online supplementary materials available at: <http://veda.cs.uiuc.edu/crmfinding/>  
This includes:

1. Set of PWMs used by Stubb.
2. Benchmark data sets with evaluation code.

Table S1: Performance of MCD and CisModule on 33 datasets in our benchmark. Column 2 shows the number of sequences in a data set, the total sequence length, and the maximum sensitivity possible. Columns 3 and 4 show the sensitivity and its empirical p-value for MCD and CisModule respectively.

| Data set                     | #Seq, Length, Max. Sens. | MCD P-val (Sens)   | CisModule P-val (Sens) |
|------------------------------|--------------------------|--------------------|------------------------|
| mapping3.adult               | 34, 254800, 0.71         | 0.44 (0.10)        | 0.21 (0.12)            |
| mapping1.adult mesoderm      | 5, 28085, 0.76           | 0.16 (0.20)        | 1.00 (0.00)            |
| mapping1.amnioserosa         | 7, 49635, 0.84           | 0.13 (0.20)        | 0.78 (0.01)            |
| mapping1.blastoderm          | 77, 698840, 0.77         | 0.95 (0.06)        | 0.79 (0.07)            |
| mapping1.cardiac mesoderm    | 8, 42979, 0.76           | 0.08 (0.22)        | 0.74 (0.04)            |
| mapping1.cns                 | 34, 352108, 0.80         | 0.25 (0.12)        | 0.27 (0.12)            |
| mapping1.dorsal ectoderm     | 8, 67490, 0.77           | 0.58 (0.07)        | 0.69 (0.05)            |
| mapping1.ectoderm            | 37, 311000, 0.72         | 0.69 (0.08)        | 0.56 (0.09)            |
| mapping2.ectoderm            | 51, 416473, 0.74         | 0.19 (0.12)        | 0.66 (0.08)            |
| mapping1.endoderm            | 16, 92723, 0.82          | 0.69 (0.06)        | 0.07 (0.18)            |
| mapping1.eye                 | 6, 49494, 0.70           | 0.54 (0.07)        | 0.10 (0.22)            |
| mapping2.eye                 | 18, 156531, 0.69         | 0.92 (0.03)        | 0.51 (0.09)            |
| mapping1.fat body            | 5, 22831, 0.93           | 1.00 (0.00)        | 1.00 (0.00)            |
| mapping1.female gonad        | 10, 44269, 0.62          | 0.74 (0.04)        | 0.81 (0.03)            |
| mapping1.glia                | 7, 63008, 0.82           | <b>0.01</b> (0.36) | 0.68 (0.05)            |
| mapping1.imaginal disc       | 47, 441597, 0.77         | 0.47 (0.10)        | 0.54 (0.09)            |
| mapping2.imaginal disc       | 12, 149915, 0.80         | 0.19 (0.16)        | 0.82 (0.04)            |
| mapping3.larva               | 69, 616635, 0.76         | 0.61 (0.08)        | 0.16 (0.12)            |
| mapping1.male gonad          | 8, 69044, 0.85           | 0.72 (0.03)        | 0.31 (0.13)            |
| mapping1.malpighian tubules  | 4, 31338, 0.81           | 0.42 (0.10)        | 1.00 (0.00)            |
| mapping1.mesectoderm         | 5, 45712, 0.83           | 0.23 (0.16)        | 0.63 (0.03)            |
| mapping1.mesoderm            | 16, 87140, 0.72          | 0.35 (0.11)        | <b>0.01</b> (0.23)     |
| mapping2.mesoderm            | 45, 233441, 0.75         | 0.07 (0.14)        | 0.94 (0.04)            |
| mapping1.neuroectoderm       | 7, 40315, 0.80           | 0.17 (0.17)        | 0.14 (0.18)            |
| mapping2.neuronal            | 54, 534081, 0.78         | 0.77 (0.07)        | 0.92 (0.05)            |
| mapping1.pns                 | 24, 234532, 0.78         | <b>0.01</b> (0.23) | 0.40 (0.10)            |
| mapping2.reproductive system | 21, 154400, 0.69         | 0.25 (0.12)        | 0.62 (0.07)            |
| mapping1.salivary gland      | 6, 47232, 0.74           | 0.70 (0.03)        | 0.29 (0.14)            |
| mapping1.somatic muscle      | 12, 86317, 0.79          | 0.81 (0.04)        | 0.16 (0.15)            |
| mapping1.tracheal system     | 9, 111351, 0.85          | 0.77 (0.04)        | 1.00 (0.00)            |
| mapping1.ventral ectoderm    | 12, 84154, 0.77          | 0.25 (0.14)        | 0.62 (0.07)            |
| mapping1.visceral mesoderm   | 12, 54278, 0.77          | <b>0.00</b> (0.37) | 0.29 (0.13)            |

Table S2: Score p-values for MCD, D2Z-set, and CSam on all data sets.

| Data Set                     | No. Seq | MCD         | D2Z-set     | CSam        |
|------------------------------|---------|-------------|-------------|-------------|
| mapping3.adult               | 34      | 0.44        | 0.72        | 0.15        |
| mapping1.adult mesoderm      | 5       | 0.16        | 0.11        | 0.51        |
| mapping1.amnioserosa         | 7       | 0.13        | 0.34        | 0.09        |
| mapping1.blastoderm          | 77      | 0.95        | 0.10        | <b>0.00</b> |
| mapping1.cardiac mesoderm    | 8       | 0.08        | <b>0.03</b> | 0.12        |
| mapping1.cns                 | 34      | 0.25        | <b>0.01</b> | <b>0.02</b> |
| mapping1.dorsal ectoderm     | 8       | 0.58        | 0.88        | 0.08        |
| mapping1.ectoderm            | 37      | 0.69        | <b>0.00</b> | <b>0.00</b> |
| mapping2.ectoderm            | 51      | 0.19        | <b>0.05</b> | <b>0.00</b> |
| mapping1.endoderm            | 16      | 0.69        | 0.31        | <b>0.01</b> |
| mapping1.eye                 | 6       | 0.54        | 0.48        | <b>0.02</b> |
| mapping2.eye                 | 18      | 0.92        | 0.68        | 0.88        |
| mapping1.fat body            | 5       | 1.00        | 1.00        | 0.45        |
| mapping1.female gonad        | 10      | 0.74        | 0.97        | 0.86        |
| mapping1.glia                | 7       | <b>0.01</b> | 0.16        | 0.21        |
| mapping1.imaginal disc       | 47      | 0.47        | <b>0.00</b> | 0.24        |
| mapping2.imaginal disc       | 12      | 0.19        | 0.12        | 0.33        |
| mapping3.larva               | 69      | 0.61        | <b>0.02</b> | <b>0.00</b> |
| mapping1.male gonad          | 8       | 0.72        | 0.46        | 0.15        |
| mapping1.malpighian tubules  | 4       | 0.42        | 1.00        | 0.30        |
| mapping1.mesectoderm         | 5       | 0.23        | 0.43        | <b>0.00</b> |
| mapping1.mesoderm            | 16      | 0.35        | 0.09        | 0.22        |
| mapping2.mesoderm            | 45      | 0.07        | <b>0.00</b> | <b>0.02</b> |
| mapping1.neuroectoderm       | 7       | 0.17        | 1.00        | <b>0.00</b> |
| mapping2.neuronal            | 54      | 0.77        | <b>0.00</b> | <b>0.00</b> |
| mapping1.pns                 | 24      | <b>0.01</b> | 0.07        | <b>0.01</b> |
| mapping2.reproductive system | 21      | 0.25        | 0.34        | 0.24        |
| mapping1.salivary gland      | 6       | 0.70        | 1.00        | 0.36        |
| mapping1.somatic muscle      | 12      | 0.81        | 0.05        | <b>0.01</b> |
| mapping1.tracheal system     | 9       | 0.77        | 0.21        | 0.18        |
| mapping1.ventral ectoderm    | 12      | 0.25        | 0.32        | <b>0.01</b> |
| mapping1.visceral mesoderm   | 12      | <b>0.00</b> | 0.32        | <b>0.01</b> |
| mapping2.wing                | 33      | 0.25        | <b>0.00</b> | <b>0.00</b> |

Table S3: Sensitivity p-values for CSam run on data sets with CRM size to total size in the ratio of 1:10 (X10) and 1:5 (X5) respectively. Column 2 shows the number of sequences in a data set, the total sequence length, and the maximum sensitivity possible. Columns 3 and 4 show the sensitivity (Sens) and its p-value (P) on each data set for X10 and X5 versions of the data set, respectively.

| Set                          | No. Seq,<br>Length, Max. sens. | CSam -X10<br>P   Sens. | CSam -X5<br>P   Sens. |
|------------------------------|--------------------------------|------------------------|-----------------------|
| mapping1.adult               | 34, 254800, 0.71               | 0.15 (0.13)            | <b>0.01</b> (0.29)    |
| mapping1.adult mesoderm      | 5, 28085, 0.76                 | 0.51 (0.05)            | 0.18 (0.28)           |
| mapping1.amnioserosa         | 7, 49635, 0.84                 | 0.09 (0.23)            | 0.16 (0.29)           |
| mapping1.blastoderm          | 77, 698840, 0.76               | <b>0.00</b> (0.26)     | <b>0.00</b> (0.35)    |
| mapping1.cardiac mesoderm    | 8, 42979, 0.76                 | 0.12 (0.19)            | <b>0.03</b> (0.37)    |
| mapping1.cns                 | 34, 352108, 0.80               | <b>0.02</b> (0.18)     | <b>0.00</b> (0.36)    |
| mapping1.dorsal ectoderm     | 8, 67490, 0.77                 | 0.08 (0.22)            | 0.78 (0.11)           |
| mapping1.ectoderm            | 37, 311000, 0.72               | <b>0.00</b> (0.21)     | <b>0.05</b> (0.26)    |
| mapping2.ectoderm            | 51, 416473, 0.73               | <b>0.00</b> (0.23)     | <b>0.00</b> (0.32)    |
| mapping1.endoderm            | 16, 92723, 0.82                | <b>0.01</b> (0.26)     | <b>0.00</b> (0.40)    |
| mapping1.eye                 | 6, 49494, 0.70                 | <b>0.02</b> (0.32)     | 0.48 (0.17)           |
| mapping2.eye                 | 18, 156531, 0.69               | 0.88 (0.04)            | 0.26 (0.20)           |
| mapping1.fat body            | 5, 22831, 0.93                 | 0.45 (0.09)            | <b>0.01</b> (0.53)    |
| mapping1.female gonad        | 10, 44269, 0.62                | 0.86 (0.02)            | 0.63 (0.14)           |
| mapping1.glia                | 7, 63008, 0.82                 | 0.21 (0.17)            | 0.10 (0.32)           |
| mapping1.imaginal disc       | 47, 441597, 0.76               | 0.24 (0.12)            | <b>0.00</b> (0.35)    |
| mapping2.imaginal disc       | 12, 149915, 0.80               | 0.33 (0.12)            | <b>0.02</b> (0.36)    |
| mapping3.larva               | 69, 616635, 0.76               | <b>0.00</b> (0.18)     | <b>0.00</b> (0.31)    |
| mapping1.male gonad          | 8, 69044, 0.85                 | 0.15 (0.18)            | 0.16 (0.27)           |
| mapping1.malpighian tubules  | 4, 31338, 0.81                 | 0.30 (0.16)            | 1.00 (0.00)           |
| mapping1.mesectoderm         | 5, 45712, 0.83                 | <b>0.00</b> (0.46)     | 0.29 (0.24)           |
| mapping1.mesoderm            | 16, 87140, 0.72                | 0.22 (0.13)            | <b>0.00</b> (0.42)    |
| mapping2.mesoderm            | 45, 233441, 0.75               | <b>0.02</b> (0.16)     | <b>0.00</b> (0.37)    |
| mapping1.neuroectoderm       | 7, 40315, 0.80                 | <b>0.00</b> (0.51)     | <b>0.00</b> (0.53)    |
| mapping2.neuronal            | 54, 534081, 0.78               | <b>0.00</b> (0.26)     | <b>0.00</b> (0.36)    |
| mapping1.pns                 | 24, 234532, 0.78               | <b>0.01</b> (0.21)     | <b>0.00</b> (0.45)    |
| mapping2.reproductive system | 21, 154400, 0.69               | 0.24 (0.12)            | <b>0.03</b> (0.28)    |
| mapping1.salivary gland      | 6, 47232, 0.74                 | 0.36 (0.11)            | 0.71 (0.11)           |
| mapping1.somatic muscle      | 12, 86317, 0.79                | <b>0.01</b> (0.28)     | <b>0.01</b> (0.37)    |
| mapping1.tracheal system     | 9, 111351, 0.85                | 0.18 (0.17)            | 0.38 (0.22)           |
| mapping1.ventral ectoderm    | 12, 84154, 0.77                | <b>0.01</b> (0.27)     | 0.15 (0.28)           |
| mapping1.visceral mesoderm   | 12, 54278, 0.77                | <b>0.01</b> (0.28)     | <b>0.00</b> (0.42)    |
| mapping2.wing                | 33, 340094, 0.78               | <b>0.00</b> (0.22)     | <b>0.00</b> (0.39)    |

Table S4: Running times (hours, minutes) for D2Z, MCD, CSam, CisModule on each data set.

| Set                          | D2Z     | MCD     | CSam    | CisModule |
|------------------------------|---------|---------|---------|-----------|
| mapping3.adult               | 4h 18m  | 4h 3m   | 9h 28m  | 9h 34m    |
| mapping1.adult mesoderm      | 0h 7m   | 0h 4m   | 1h 17m  | 1h 10m    |
| mapping1.amnioserosa         | 0h 19m  | 0h 10m  | 1h 5m   | 2h        |
| mapping1.blastoderm          | 27h 37m | 26h 10m | 15h 26m | 26h 35m   |
| mapping1.cardiac mesoderm    | 0h 21m  | 0h 10m  | 1h 10m  | 1h 41m    |
| mapping1.cns                 | 4h 18m  | 5h 29m  | 6h 1m   | 14h 47m   |
| mapping1.dorsal ectoderm     | 0h 26m  | 0h 16m  | 1h 14m  | 2h 49m    |
| mapping1.ectoderm            | 5h 13m  | 5h 20m  | 6h 28m  | 12h 11m   |
| mapping2.ectoderm            | 10h 51m | 9h 44m  | 9h 17m  | 17h 25m   |
| mapping1.endoderm            | 1h 10m  | 0h 42m  | 2h 34m  | 3h 28m    |
| mapping1.eye                 | 0h 19m  | 0h 10m  | 1h 49m  | 2h 4m     |
| mapping2.eye                 | 1h 24m  | 1h 23m  | 2h 49m  | 5h 20m    |
| mapping1.fat body            | 0h 7m   | 0h 3m   | 0h 44m  | 0h 49m    |
| mapping1.female gonad        | 0h 31m  | 0h 13m  | 1h 28m  | 1h 42m    |
| mapping1.glia                | 0h 22m  | 0h 13m  | 1h 53m  | 2h 19m    |
| mapping1.imaginal disc       | 8h 53m  | 9h 26m  | 8h 22m  | 16h 50m   |
| mapping2.imaginal disc       | 0h 46m  | 0h 52m  | 1h 56m  | 5h 39m    |
| mapping3.larva               | 22h 6m  | 19h 38m | 12h 49m | 23h 44m   |
| mapping1.male gonad          | 0h 26m  | 0h 16m  | 1h 14m  | 2h 56m    |
| mapping1.malpighian tubules  | 0h 7m   | 0h 4m   | 0h 39m  | 1h 9m     |
| mapping1.mesectoderm         | 0h 18m  | 0h 7m   | 0h 47m  | 1h 44m    |
| mapping1.mesoderm            | 1h 10m  | 0h 40m  | 2h 30m  | 3h 16m    |
| mapping2.mesoderm            | 7h 39m  | 4h 58m  | 7h 6m   | 8h 32m    |
| mapping1.neuroectoderm       | 0h 18m  | 0h 9m   | 1h 1m   | 1h 32m    |
| mapping2.neuronal            | 12h 38m | 13h 58m | 10h 24m | 20h 5m    |
| mapping1.pns                 | 2h 14m  | 2h 37m  | 6h 46m  | 9h 16m    |
| mapping2.reproductive system | 1h 48m  | 1h 34m  | 3h 32m  | 6h 8m     |
| mapping1.salivary gland      | 0h 19m  | 0h 8m   | 1h 32m  | 1h 49m    |
| mapping1.somatic muscle      | 0h 45m  | 0h 29m  | 1h 49m  | 3h 31m    |
| mapping1.tracheal system     | 0h 31m  | 0h 30m  | 1h 28m  | 3h 55m    |
| mapping1.ventral ectoderm    | 0h 46m  | 0h 30m  | 3h 12m  | 3h 32m    |
| mapping1.visceral mesoderm   | 0h 45m  | 0h 19m  | 1h 51m  | 2h 14m    |
| mapping2.wing                | 3h 59m  | 5h 6m   | 5h 44m  | 12h 29m   |

Table S5: Performance of Stubb, CSam, D2z-set, CisModule and MCD, when all tests are performed with an input CRM length of 750 bp. Columns 2-6 show the sensitivity and its empirical p-value for each method. Significant performance values (p-value  $\leq 0.05$ ) are shown in boldface.

| Data set                     | Stubb<br>Pval (Sens) | CSam<br>Pval (Sens) | D2z-set<br>Pval (Sens) | CisModule<br>Pval (Sens) | MCD<br>Pval (Sens) |
|------------------------------|----------------------|---------------------|------------------------|--------------------------|--------------------|
| mapping3 adult               | <b>0.01 (0.20)</b>   | 0.11 (0.14)         | 0.84 (0.06)            | 0.64 (0.08)              | 0.91 (0.05)        |
| mapping1 adult mesoderm      | 0.51 (0.05)          | 0.15 (0.25)         | 0.10 (0.29)            | 0.16 (0.19)              | 0.18 (0.23)        |
| mapping1 amnioserosa         | 0.33 (0.13)          | 0.20 (0.18)         | 1.00 (0.00)            | 0.28 (0.14)              | 0.65 (0.06)        |
| mapping1 blastoderm          | <b>0.00 (0.31)</b>   | <b>0.00 (0.25)</b>  | 0.29 (0.09)            | 0.91 (0.06)              | 0.96 (0.04)        |
| mapping1 cardiac mesoderm    | 0.14 (0.19)          | <b>0.05 (0.32)</b>  | <b>0.04 (0.32)</b>     | 0.12 (0.20)              | <b>0.02 (0.38)</b> |
| mapping1 cns                 | 0.64 (0.08)          | 0.09 (0.11)         | <b>0.02 (0.14)</b>     | 0.81 (0.06)              | 0.17 (0.10)        |
| mapping1 dorsal ectoderm     | 0.14 (0.19)          | 0.42 (0.09)         | 0.77 (0.03)            | 0.45 (0.10)              | 0.72 (0.04)        |
| mapping1 ectoderm            | 0.09 (0.15)          | <b>0.01 (0.17)</b>  | <b>0.01 (0.18)</b>     | 0.55 (0.09)              | 0.54 (0.08)        |
| mapping2 ectoderm            | <b>0.05 (0.15)</b>   | <b>0.00 (0.21)</b>  | <b>0.04 (0.14)</b>     | 0.66 (0.08)              | 0.19 (0.11)        |
| mapping1 endoderm            | <b>0.01 (0.26)</b>   | <b>0.00 (0.34)</b>  | 0.20 (0.17)            | <b>0.04 (0.20)</b>       | 0.69 (0.08)        |
| mapping2 eye                 | 0.30 (0.12)          | 0.55 (0.08)         | 0.66 (0.06)            | 0.54 (0.09)              | 0.72 (0.06)        |
| mapping1 eye                 | 1.00 (0.00)          | 0.30 (0.12)         | 0.46 (0.08)            | 0.27 (0.14)              | 0.41 (0.10)        |
| mapping1 fat body            | 1.00 (0.00)          | 0.06 (0.40)         | 0.74 (0.01)            | <b>0.02 (0.37)</b>       | 0.28 (0.22)        |
| mapping1 female gonad        | <b>0.00 (0.44)</b>   | 0.57 (0.11)         | 0.71 (0.08)            | 0.32 (0.11)              | 0.83 (0.06)        |
| mapping1 glia                | 0.79 (0.01)          | 0.44 (0.08)         | 0.32 (0.11)            | 0.47 (0.09)              | <b>0.00 (0.40)</b> |
| mapping1 imaginal disc       | 0.73 (0.08)          | <b>0.00 (0.16)</b>  | 0.06 (0.12)            | 0.54 (0.09)              | 0.17 (0.10)        |
| mapping2 imaginal disc       | 0.73 (0.05)          | 0.48 (0.06)         | 0.56 (0.05)            | 0.73 (0.05)              | 0.23 (0.09)        |
| mapping3 larva               | 0.19 (0.11)          | <b>0.00 (0.16)</b>  | <b>0.00 (0.15)</b>     | 0.72 (0.07)              | 0.98 (0.04)        |
| mapping1 male gonad          | 0.38 (0.12)          | 0.61 (0.05)         | 0.40 (0.10)            | 0.35 (0.12)              | 0.76 (0.03)        |
| mapping1 malpighian tubules  | 0.13 (0.24)          | 1.00 (0.00)         | 1.00 (0.00)            | 0.44 (0.09)              | 0.42 (0.10)        |
| mapping1 mesectoderm         | 0.33 (0.13)          | 1.00 (0.00)         | 0.45 (0.08)            | 0.44 (0.10)              | 0.19 (0.16)        |
| mapping1 mesoderm            | <b>0.01 (0.25)</b>   | 0.19 (0.18)         | 0.15 (0.19)            | 0.36 (0.10)              | 0.98 (0.01)        |
| mapping2 mesoderm            | <b>0.00 (0.25)</b>   | <b>0.00 (0.37)</b>  | <b>0.00 (0.37)</b>     | <b>0.03 (0.16)</b>       | 0.24 (0.15)        |
| mapping1 neuroectoderm       | <b>0.00 (0.38)</b>   | <b>0.03 (0.34)</b>  | 0.83 (0.00)            | <b>0.05 (0.25)</b>       | 0.20 (0.20)        |
| mapping2 neuronal            | 0.49 (0.09)          | <b>0.00 (0.22)</b>  | <b>0.00 (0.15)</b>     | 0.66 (0.08)              | 0.90 (0.04)        |
| mapping1 pns                 | <b>0.05 (0.17)</b>   | <b>0.00 (0.26)</b>  | 0.49 (0.07)            | 0.76 (0.06)              | <b>0.01 (0.18)</b> |
| mapping2 reproductive system | 0.17 (0.13)          | 0.12 (0.15)         | 0.23 (0.12)            | 0.37 (0.10)              | 0.26 (0.12)        |
| mapping1 salivary gland      | 0.71 (0.03)          | 0.35 (0.11)         | 1.00 (0.00)            | 0.62 (0.06)              | 0.65 (0.04)        |
| mapping1 somatic muscle      | 0.29 (0.12)          | <b>0.01 (0.28)</b>  | 0.06 (0.21)            | 0.14 (0.16)              | 0.68 (0.06)        |
| mapping1 tracheal system     | 0.75 (0.04)          | 0.64 (0.04)         | <b>0.00 (0.26)</b>     | 0.75 (0.04)              | 0.06 (0.15)        |
| mapping1 ventral ectoderm    | <b>0.00 (0.49)</b>   | 0.37 (0.12)         | 0.29 (0.14)            | 0.60 (0.08)              | <b>0.03 (0.25)</b> |
| mapping1 visceral mesoderm   | 0.25 (0.14)          | <b>0.01 (0.41)</b>  | 0.39 (0.17)            | 0.07 (0.20)              | 0.75 (0.09)        |
| mapping2 wing                | 0.32 (0.11)          | <b>0.00 (0.18)</b>  | <b>0.01 (0.15)</b>     | 0.61 (0.08)              | 0.56 (0.06)        |

Table S6: Performance of Stubb, CSam, D2z-set, CisModule and MCD, on “native” data sets. Significant performance values (p-value  $\leq 0.05$ ) are shown in boldface. Data sets were constructed as follows: (i) For each CRM, extract its flanking region in the genome; the length of this control region is chosen to be 9 times the length of the CRM. (ii) If the control region of one CRM intersects that of another, or intersects another CRM, “shift” either the first or the second control region, such that there are no overlapping control regions in the same data set. (This implies that each resulting control region has one CRM within it.) (iii) If a control region overlaps with a gene, the gene portion of the control region is masked, thereby reducing the size of the control region. Out of the original total of 718 sequences, 206 were altered in this way.

| Data set                     | Stubb<br>P-val (Sens) | CSam<br>P-val (Sens) | D2z-set<br>P-val (Sens) | CisModule<br>P-val (Sens) | MCD<br>P-val (Sens) |
|------------------------------|-----------------------|----------------------|-------------------------|---------------------------|---------------------|
| mapping3 adult               | 0.29 (0.12)           | 0.08 (0.16)          | 0.41 (0.11)             | 0.29 (0.12)               | 0.30 (0.12)         |
| mapping1 adult mesoderm      | 0.74 (0.02)           | <b>0.05 (0.30)</b>   | 0.53 (0.04)             | 0.11 (0.23)               | 0.74 (0.03)         |
| mapping1 amnioserosa         | 0.74 (0.02)           | 0.15 (0.19)          | 0.08 (0.23)             | 0.33 (0.12)               | 1.00 (0.00)         |
| mapping1 blastoderm          | <b>0.00 (0.24)</b>    | <b>0.04 (0.15)</b>   | 0.09 (0.14)             | 0.29 (0.12)               | <b>0.01 (0.17)</b>  |
| mapping1 cardiac mesoderm    | 0.60 (0.07)           | 0.15 (0.18)          | <b>0.00 (0.35)</b>      | 0.28 (0.13)               | 0.77 (0.03)         |
| mapping1 cns                 | 0.81 (0.07)           | 0.99 (0.03)          | 0.11 (0.16)             | 0.56 (0.10)               | 0.33 (0.13)         |
| mapping1 dorsal ectoderm     | <b>0.00 (0.38)</b>    | 0.42 (0.11)          | 0.30 (0.14)             | 0.22 (0.16)               | 0.26 (0.15)         |
| mapping1 ectoderm            | <b>0.01 (0.19)</b>    | 0.08 (0.16)          | 0.19 (0.13)             | 0.30 (0.12)               | 0.65 (0.09)         |
| mapping2 ectoderm            | <b>0.00 (0.22)</b>    | <b>0.01 (0.19)</b>   | 0.19 (0.13)             | 0.51 (0.10)               | 0.62 (0.09)         |
| mapping1 endoderm            | 0.15 (0.16)           | 0.15 (0.16)          | 0.55 (0.09)             | 0.47 (0.10)               | 0.19 (0.15)         |
| mapping1 eye                 | 0.25 (0.17)           | 0.56 (0.08)          | 1.00 (0.00)             | 0.39 (0.12)               | 0.14 (0.21)         |
| mapping2 eye                 | 0.34 (0.14)           | 0.80 (0.07)          | 0.08 (0.20)             | 0.57 (0.10)               | 0.78 (0.07)         |
| mapping1 fat body            | 0.42 (0.11)           | 1.00 (0.00)          | 1.00 (0.00)             | 0.20 (0.18)               | 0.64 (0.02)         |
| mapping1 female gonad        | 0.39 (0.10)           | 0.24 (0.13)          | 0.07 (0.19)             | 0.53 (0.07)               | 0.32 (0.11)         |
| mapping1 glia                | 0.71 (0.05)           | 0.11 (0.23)          | 0.14 (0.22)             | 0.36 (0.14)               | 0.73 (0.04)         |
| mapping1 imaginal disc       | 0.87 (0.07)           | <b>0.00 (0.21)</b>   | <b>0.03 (0.18)</b>      | 0.45 (0.11)               | <b>0.00 (0.21)</b>  |
| mapping2 imaginal disc       | 0.97 (0.01)           | 0.41 (0.14)          | 0.16 (0.21)             | 0.29 (0.17)               | 0.65 (0.09)         |
| mapping3 larva               | 0.70 (0.09)           | 0.53 (0.11)          | 0.15 (0.14)             | 0.52 (0.11)               | 0.93 (0.07)         |
| mapping1 male gonad          | 0.38 (0.12)           | 0.10 (0.21)          | 0.82 (0.02)             | 0.10 (0.21)               | 0.25 (0.15)         |
| mapping1 malpighian tubules  | 0.06 (0.32)           | 0.59 (0.02)          | 1.00 (0.00)             | 0.54 (0.05)               | 1.00 (0.00)         |
| mapping1 mesectoderm         | 0.24 (0.18)           | 0.10 (0.26)          | 1.00 (0.00)             | 0.47 (0.10)               | 1.00 (0.00)         |
| mapping1 mesoderm            | <b>0.00 (0.28)</b>    | <b>0.05 (0.20)</b>   | 0.07 (0.19)             | 0.69 (0.07)               | <b>0.04 (0.20)</b>  |
| mapping2 mesoderm            | 0.06 (0.15)           | <b>0.02 (0.17)</b>   | 0.11 (0.14)             | 0.19 (0.12)               | 0.06 (0.15)         |
| mapping1 neuroectoderm       | <b>0.02 (0.31)</b>    | 0.28 (0.15)          | 0.19 (0.18)             | 0.46 (0.10)               | 0.09 (0.23)         |
| mapping2 neuronal            | 0.48 (0.11)           | 0.21 (0.13)          | <b>0.02 (0.18)</b>      | 0.60 (0.10)               | <b>0.04 (0.17)</b>  |
| mapping1 pns                 | <b>0.03 (0.21)</b>    | <b>0.01 (0.24)</b>   | 0.65 (0.09)             | 0.19 (0.15)               | 0.13 (0.16)         |
| mapping2 reproductive system | 0.15 (0.15)           | 0.82 (0.05)          | 0.29 (0.12)             | 0.26 (0.13)               | 0.82 (0.05)         |
| mapping1 salivary gland      | 0.26 (0.16)           | 0.42 (0.11)          | 0.27 (0.16)             | 0.30 (0.15)               | 1.00 (0.00)         |
| mapping1 somatic muscle      | 0.61 (0.08)           | 0.06 (0.22)          | 0.94 (0.01)             | 0.70 (0.06)               | 0.23 (0.15)         |
| mapping1 tracheal system     | 0.15 (0.21)           | 0.39 (0.14)          | 0.28 (0.17)             | 0.36 (0.14)               | <b>0.03 (0.31)</b>  |
| mapping1 ventral ectoderm    | 0.14 (0.18)           | 0.61 (0.08)          | 0.56 (0.09)             | 0.21 (0.16)               | 0.24 (0.15)         |
| mapping1 visceral mesoderm   | 0.21 (0.14)           | <b>0.01 (0.26)</b>   | 0.25 (0.13)             | 0.38 (0.11)               | 0.17 (0.16)         |
| mapping2 wing                | 0.41 (0.12)           | 0.22 (0.14)          | <b>0.01 (0.21)</b>      | 0.20 (0.15)               | 0.12 (0.16)         |

Table S7: CRM-level sensitivity of Stubb, CSam, D2z-set, CisModule and MCD, on “native” data sets. Columns 3 - 7 show the fraction (and number) of CRMs in a data set that were “hits”. Best CRM-level sensitivity for each data set is in bold.

| Data set                     |    | Stubb            | CSam             | D2z-set          | CisModule       | MCD              |
|------------------------------|----|------------------|------------------|------------------|-----------------|------------------|
| mapping3.adult               | 34 | 0.26 (9)         | <b>0.35</b> (12) | 0.26 (9)         | 0.15 (5)        | 0.24 (8)         |
| mapping1.adult mesoderm      | 5  | 0.20 (1)         | <b>0.60</b> (3)  | 0.20 (1)         | 0.20 (1)        | 0.20 (1)         |
| mapping1.amnioserosa         | 7  | 0.00 (0)         | 0.29 (2)         | <b>0.43</b> (3)  | 0.00 (0)        | 0.00 (0)         |
| mapping1.blastoderm          | 77 | <b>0.35</b> (27) | 0.25 (19)        | 0.27 (21)        | 0.16 (12)       | 0.31 (24)        |
| mapping1.cardiac mesoderm    | 8  | 0.12 (1)         | 0.25 (2)         | <b>0.50</b> (4)  | 0.12 (1)        | 0.00 (0)         |
| mapping1.cns                 | 34 | 0.09 (3)         | 0.09 (3)         | <b>0.24</b> (8)  | 0.09 (3)        | 0.21 (7)         |
| mapping1.dorsal ectoderm     | 8  | <b>0.50</b> (4)  | 0.12 (1)         | 0.12 (1)         | 0.12 (1)        | 0.25 (2)         |
| mapping1.ectoderm            | 37 | <b>0.32</b> (12) | 0.30 (11)        | 0.27 (10)        | 0.14 (5)        | 0.16 (6)         |
| mapping2.ectoderm            | 51 | <b>0.33</b> (17) | 0.31 (16)        | 0.24 (12)        | 0.08 (4)        | 0.20 (10)        |
| mapping1.endoderm            | 16 | <b>0.19</b> (3)  | <b>0.19</b> (3)  | <b>0.19</b> (3)  | 0.06 (1)        | <b>0.19</b> (3)  |
| mapping1.eye                 | 6  | <b>0.33</b> (2)  | <b>0.33</b> (2)  | 0.00 (0)         | 0.17 (1)        | 0.17 (1)         |
| mapping2.eye                 | 18 | 0.22 (4)         | 0.11 (2)         | <b>0.28</b> (5)  | 0.11 (2)        | 0.17 (3)         |
| mapping1.fat body            | 5  | 0.00 (0)         | 0.00 (0)         | 0.00 (0)         | <b>0.20</b> (1) | 0.00 (0)         |
| mapping1.female gonad        | 10 | 0.10 (1)         | 0.10 (1)         | <b>0.30</b> (3)  | 0.20 (2)        | 0.20 (2)         |
| mapping1.glia                | 7  | 0.14 (1)         | <b>0.43</b> (3)  | <b>0.43</b> (3)  | 0.00 (0)        | 0.00 (0)         |
| mapping1.imaginal disc       | 47 | 0.13 (6)         | <b>0.36</b> (17) | 0.32 (15)        | 0.11 (5)        | 0.32 (15)        |
| mapping2.imaginal disc       | 12 | 0.00 (0)         | 0.17 (2)         | <b>0.25</b> (3)  | 0.08 (1)        | 0.17 (2)         |
| mapping3.larva               | 69 | 0.16 (11)        | 0.16 (11)        | <b>0.23</b> (16) | 0.12 (8)        | 0.10 (7)         |
| mapping1.male gonad          | 8  | <b>0.25</b> (2)  | <b>0.25</b> (2)  | 0.12 (1)         | 0.12 (1)        | 0.12 (1)         |
| mapping1.malpighian tubules  | 4  | <b>0.25</b> (1)  | 0.00 (0)         | 0.00 (0)         | 0.00 (0)        | 0.00 (0)         |
| mapping1.mesectoderm         | 5  | 0.20 (1)         | <b>0.40</b> (2)  | 0.00 (0)         | 0.00 (0)        | 0.00 (0)         |
| mapping1.mesoderm            | 16 | 0.38 (6)         | 0.38 (6)         | 0.38 (6)         | 0.12 (2)        | <b>0.44</b> (7)  |
| mapping2.mesoderm            | 45 | 0.27 (12)        | 0.24 (11)        | 0.24 (11)        | 0.11 (5)        | <b>0.29</b> (13) |
| mapping1.neuroectoderm       | 7  | <b>0.43</b> (3)  | 0.14 (1)         | 0.29 (2)         | 0.14 (1)        | 0.29 (2)         |
| mapping2.neuronal            | 54 | 0.13 (7)         | 0.20 (11)        | <b>0.26</b> (14) | 0.06 (3)        | 0.22 (12)        |
| mapping1.pns                 | 24 | 0.29 (7)         | <b>0.42</b> (10) | 0.21 (5)         | 0.08 (2)        | 0.29 (7)         |
| mapping2.reproductive system | 20 | <b>0.30</b> (6)  | 0.10 (2)         | 0.25 (5)         | 0.15 (3)        | 0.05 (1)         |
| mapping1.salivary gland      | 6  | <b>0.33</b> (2)  | 0.17 (1)         | 0.17 (1)         | 0.17 (1)        | 0.00 (0)         |
| mapping1.somatic muscle      | 12 | 0.17 (2)         | <b>0.33</b> (4)  | 0.00 (0)         | 0.08 (1)        | 0.25 (3)         |
| mapping1.tracheal system     | 9  | 0.22 (2)         | 0.22 (2)         | 0.11 (1)         | 0.00 (0)        | <b>0.44</b> (4)  |
| mapping1.ventral ectoderm    | 12 | <b>0.25</b> (3)  | 0.08 (1)         | 0.17 (2)         | 0.17 (2)        | 0.08 (1)         |
| mapping1.visceral mesoderm   | 12 | 0.17 (2)         | <b>0.33</b> (4)  | 0.25 (3)         | 0.00 (0)        | 0.25 (3)         |
| mapping2.wing                | 33 | 0.18 (6)         | 0.24 (8)         | <b>0.33</b> (11) | 0.09 (3)        | 0.24 (8)         |
